# Supplementary material for: Therapeutic strategies based on modified U1 snRNAs and chaperones for Sanfilippo C splicing mutations
Source: PubMed Central journal article supplement (PMC4279800; doi:10.1186/s13023-014-0180-y), 2014-12-10
Supplement: 13023_2014_180_MOESM2_ESM.pdf [file 13023_2014_180_MOESM2_ESM.pdf]

A) Wild-type sequence

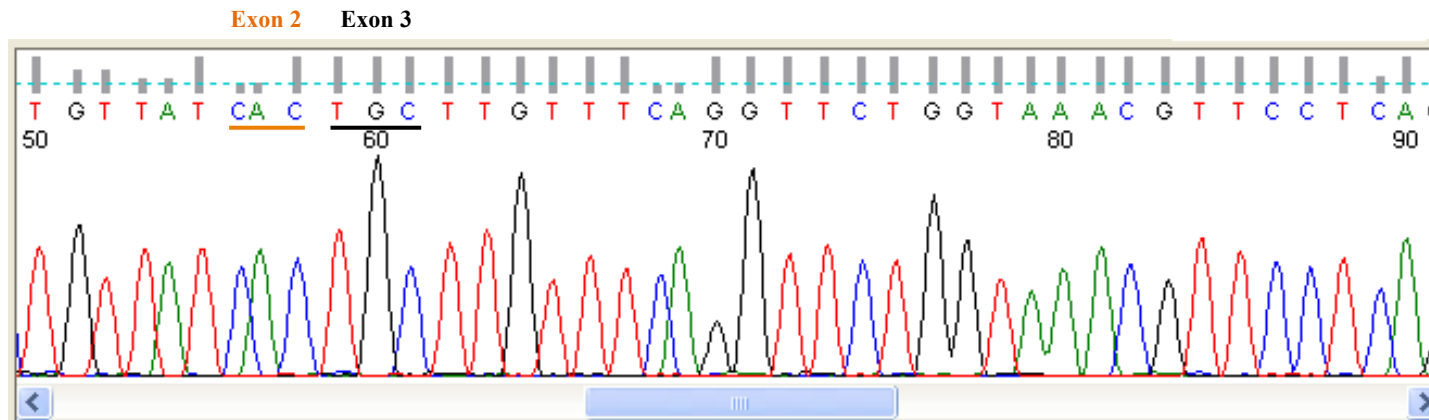

Normal exon 2 – exon 3 sequence ...TATCACTGCTTGTTCAGGTTCTGGTAAACGTTCTCAG...

B) c.234+1G>A sequence after U1 sup 4 treatment

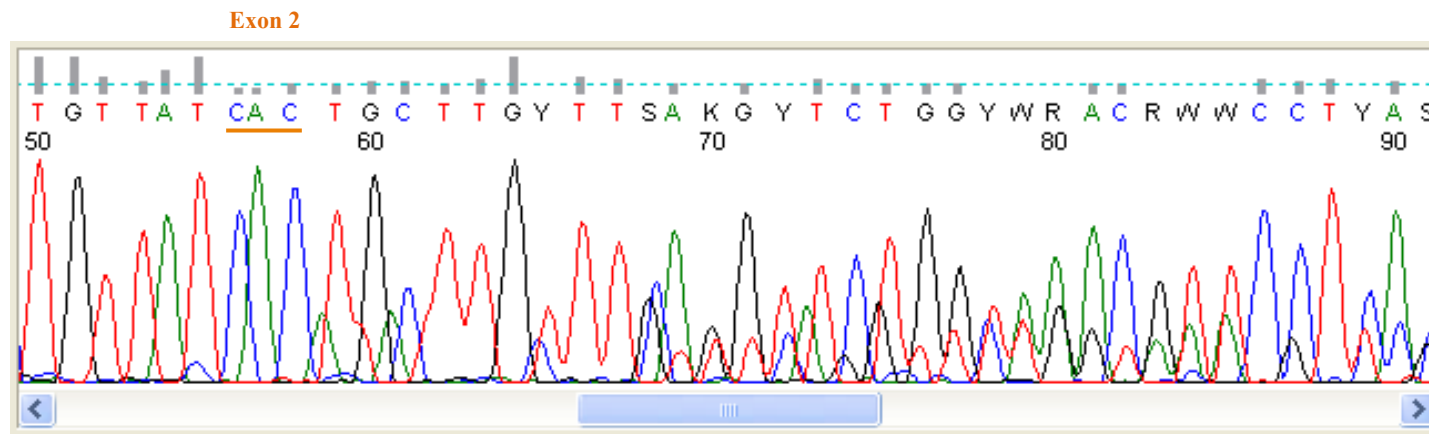

Two sequences:

Normal exon 2 – exon 3 sequence ...TATCACTGCTTGTTCAGGTTCTGGTAAACGTTCTCAG...

Aberrant exon 2 – exon 3 sequence ...TATCACatTGCTTGTTCAGGTTCTGGTAAACGTTCTCAG...
