# Supplementary material for: Therapeutic strategies based on modified U1 snRNAs and chaperones for Sanfilippo C splicing mutations
Source: PubMed Central journal article supplement (PMC4279800; doi:10.1186/s13023-014-0180-y), 2014-12-10

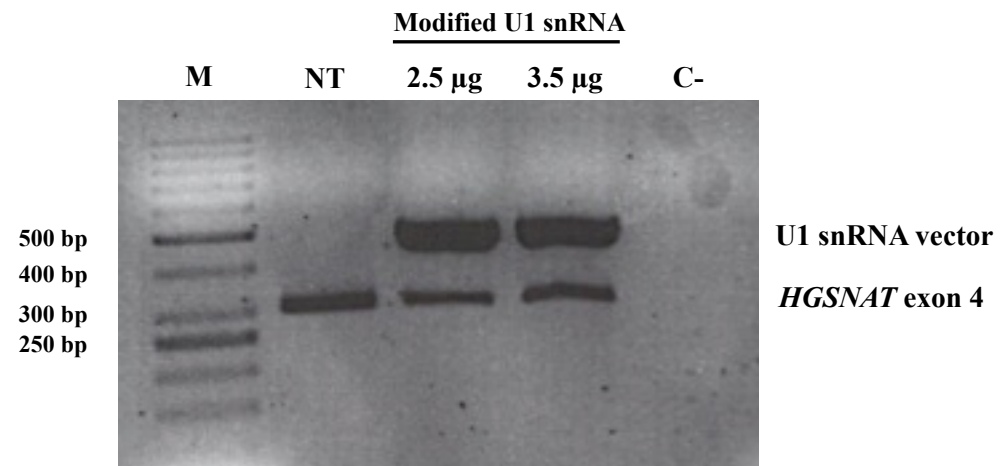

Supplement: 13023_2014_180_MOESM3_ESM.pdf [file 13023_2014_180_MOESM3_ESM.pdf]
