# Supplementary material for: Therapeutic strategies based on modified U1 snRNAs and chaperones for Sanfilippo C splicing mutations
Source: Springer Nature journal article supplement (doi:10.1186/s13023-014-0180-y), 2014-12-01
Supplement: MOESM1 [file 9775938]

| Oligonucleotide                  | Sequence (5' to 3')                               |
|----------------------------------|---------------------------------------------------|
| <b>RT-PCR fragments*</b>         |                                                   |
| HGSNAT-Exon 1F                   | GCAGCGGGCAGGCAAGGGCGG                             |
| HGSNAT-Exon 2F                   | ACATGCAGAGCTGAAGATGGA                             |
| HGSNAT-Exon 3R                   | GATAGATCCGTGCTGGGTG                               |
| HGSNAT-Exon 4F                   | AGCTGAACGACACCTTGAA                               |
| HGSNAT-Exon 4R                   | CAATGATGACAGCAAGACCAA                             |
| HGSNAT-Exon 6F                   | TGCATTCCATTATTGGTCTTGC                            |
| HGSNAT-Exon 6R                   | ATCACCATCGAGAGGGTCTG                              |
| c.1542+4dupA F                   | ACCTGTGCCTGAACATTGTG                              |
| c.1542+4dupA R                   | CAGAAACCTTCGTCAGAGCA                              |
| HGSNAT-Exon 5F                   | CCTTTCTGAGGCTCTTGTTG                              |
| HGSNAT-Exon 12F                  | AGGAGCTGCCTTTCTCTTC                               |
| HGSNAT-Exon 13R                  | TGATCGTCTCCCAGCAGCA                               |
| HGSNAT-Exon 16R                  | ACCTTCGTGTCAGAGCAACAG                             |
| <b>DNA fragments*</b>            |                                                   |
| HGSNAT Exon 4 F                  | TTATTCTGCCTCCATGATATTAGC                          |
| HGSNAT Exon 4 R                  | CTACAGAAAGCGTCATGGACTGC                           |
| <b>Cloning fragments*</b>        |                                                   |
| Intron 1 F                       | GCAAAAGGAGACCTGTGTGTG                             |
| Intron 3 R                       | TCATCCCTGAGAACTGGCTTT                             |
| <b>Plasmid Vectors</b>           |                                                   |
| SD6 F                            | TCTGAGTCACCTGGACAACC                              |
| SA2 R                            | ATCTCAGTGGTATTTGTGAGC                             |
| pGEMQ                            | ATCGAAATTAATACGACTCA                              |
| U1-QR                            | CTGGGAAAACCACCTTCGT                               |
| <b>Site-directed mutagenesis</b> |                                                   |
| <b>pSPL3 WT minigenes</b>        |                                                   |
| Exon 2 F                         | GGAAATCTGAATGCTGTTATCACATATGTATCAGTTCACACTCAG     |
| Exon 2 R                         | CTGAGTGTGAACTGATACATATGTGATAACAGCATTTCAGATTTCC    |
| Exon 6 F                         | CTGATCGCCTCATCAATTCTGTAAGTTATGAGATGCATAGTG        |
| Exon 6 R                         | CACTATGCATCTCATAACTTACAGAATTGATGAGGCGATCAG        |
| Exon 15 F                        | GGTGTGTTGATTCTTGTAAGTAAGCAGCATTCCCTCGC            |
| Exon 15 R                        | GCGAGGAATGCTGCTTACTTACAAGAATACAACACC              |
| <b>U1snRNA vectors</b>           |                                                   |
| U1 suppressor 1 F                | GATCTCATACTTATCTGGCAGGGGAGATAC                    |
| U1 suppressor 1 R                | GTATCTCCCCTGCCAGATAAGTATGAGATC                    |
| U1 suppressor 2 F                | GATCTCATACTTATGTGGCAGGGGAGATAC                    |
| U1 suppressor 2 R                | GTATCTCCCCTGCCACATAAGTATGAGATC                    |
| U1 suppressor 3 F                | CAAGATCTCATAACATACGTTGGCAGGGGAGATAC               |
| U1 suppressor 3 R                | GTATCTCCCCTGCCACGTATGTATGAGATCTTG                 |
| U1 suppressor 4 F                | CAAGATCTCATAACATATGTGGCAGGGGAG                    |
| U1 suppressor 4 R                | CTCCCCTGCCACATATGTATGAGATCTTG                     |
| U1 suppressor 5 F                | GATCTCATACTTATCTGGCAGGGGAGATAC                    |
| U1 suppressor 5 R                | GTATCTCCCCTGCCAGATAAGTATGAGATC                    |
| U1 suppressor 6 F                | GAGGCCAAGATCTCTAACTTATAGAGCAGGGGAGATACCATG        |
| U1 suppressor 6 R                | CATGGTATCTCCCCTGCTCTATAAGTTAGAGATCTTGGGCCCTC      |
| U1 suppressor 7 F                | AGGCCAAGATCTCATACTTACAAGGCAGGGGAGATACC            |
| U1 suppressor 7 R                | GGTATCTCCCCTGCCCTTGTAAGTATGAGATCTTGGGCCCT         |
| U1 suppressor 8 F                | GCAGAGGCCAAGATCTCAACTTTACCTGGCAGGGGAGATA          |
| U1 suppressor 8 R                | TATCTCCCCTGCCAGGTAAGTTGAGATCTTGGGCCCTCTGC         |
| U1 suppressor 9 F                | GTGTCGGGGCAGAGGCCAAGATCTCAACTTTACAAGGCAGGGGAGATAC |
| U1 suppressor 9 R                | GTATCTCCCCTGCCCTTGTAAGTTGAGATCTTGGGCCCTGCCCCGACAC |

\* Primers were designed according to the sequence described in the ENSEMBL database ([www.ensembl.org](http://www.ensembl.org); ENSG00000165102). **F** – Forward; **R** – Reverse
