# Supplementary material for: Therapeutic strategies based on modified U1 snRNAs and chaperones for Sanfilippo C splicing mutations
Source: Springer Nature journal article supplement (doi:10.1186/s13023-014-0180-y), 2014-12-01
Supplement: MOESM4 [file 9775938]

| Predictor                                                        | Normal     | Alternative | Normal mutated | Alternative mutated |
|------------------------------------------------------------------|------------|-------------|----------------|---------------------|
|                                                                  | CTT/gtaagt | taa/gtaagc  | CTT/gtaaag     | aaa/gtaagc          |
| <b>Splice site score calculation (Max = 12.6)<sup>1</sup></b>    | 6.9        | 6.2         | 2              | 7.6                 |
| <b>Analyzer splice tool (Max = 100)<sup>2</sup></b>              | 78.94      | 78.17       | 61.92          | 81.99               |
| <b>Splice site prediction by neuronal network (Max = 1) [29]</b> | 0.95       | 0           | 0              | 0.97                |
| <b>MaxEntScan (Max = 12) [30]</b>                                | 8          | 5.66        | -3             | 7.31                |
| <b>Human splicing finder (Max = 100) [31]</b>                    | 84.38      | 85.27       | 70.28          | 86.29               |

1. [http://rulai.cshl.edu/new\\_alt\\_exon\\_db2/HTML/score.html](http://rulai.cshl.edu/new_alt_exon_db2/HTML/score.html)

2. <http://ibis.tau.ac.il/ssat/SpliceSiteFrame.htm>
